# Supplementary material for: Third-party type 2 innate lymphoid cells prevent and treat GI tract GvHD
Source: PubMed Central journal article supplement — Blood Adv. 2021 Nov 16;5(22):4578–89. doi: 10.1182/bloodadvances.2020001514 (PMC8759141; doi:10.1182/bloodadvances.2020001514), 2021-11-16
Supplement: advancesADV2020001514-suppl1.pdf [file advancesADV2020001514-suppl1.pdf]

## Supplemental Figure 1

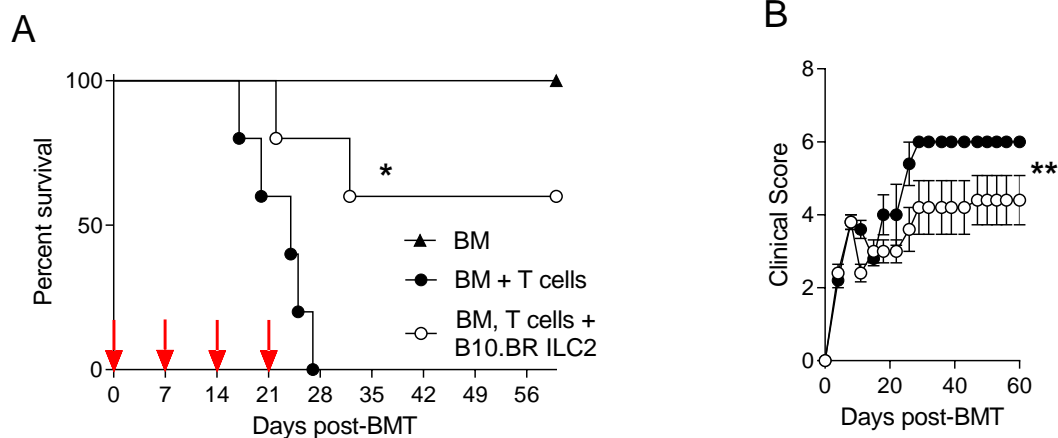

**Supplemental Figure 1.** (A) Kaplan-Meier plot of B6D2 female recipient survival following A-HSCT, red arrows indicate time points for B10.BR ILC2 injections, one representative of 2 experiments shown (n=5 each experiment), Log-rank (Mantel-Cox) test, (B) Clinical score of recipients from (Supplemental Fig. 1A), analyzed by 2-way ANOVA, with Bonferroni correction for repeated measures of multiple comparisons. \*  $p < 0.05$ , \*\*  $p < 0.01$
